# Supplementary material for: Reduction of A-to-I RNA editing in the failing human heart regulates formation of circular RNAs
Source: Springer Nature journal article supplement (doi:10.1007/s00395-022-00940-9), 2022-06-23

# Supplementary Figures: Reduction of A-to-I RNA editing in the failing human heart regulates formation of circular RNAs

## Basic Research in Cardiology

Karoline E. Kokot, MSc<sup>1</sup>, Jasmin M. Kneuer, MSc<sup>1</sup>, David John, PhD<sup>2,3</sup>, Sabine Rebs, PhD<sup>4-6</sup>, Maximilian N. Möbius-Winkler<sup>1</sup>, Stephan Erbe<sup>1</sup>, Marion Müller, PhD<sup>7</sup>, Michael Andritschke<sup>1</sup>, Susanne Gaul, PhD<sup>1</sup>, Bilal N. Sheikh, PhD<sup>8</sup>, Jan Haas, PhD<sup>9,10</sup>, Holger Thiele, MD<sup>11</sup>, Oliver J. Müller<sup>12,13</sup>, Susanne Hille<sup>12,13</sup>, Florian Leuschner, MD<sup>9,10</sup>, Stefanie Dimmeler, PhD<sup>2,3</sup>, Katrin Streckfuss-Bömeke, PhD<sup>4-6</sup>, Benjamin Meder, MD<sup>9,10</sup>, Ulrich Laufs, MD<sup>1</sup>, Jes-Niels Boeckel, PhD<sup>1\*</sup>

<sup>1</sup> *Klinik und Poliklinik für Kardiologie, Universitätsklinikum Leipzig, Liebigstrasse 20, Leipzig, Germany.*

<sup>2</sup> *Institute for Cardiovascular Regeneration, Goethe-University Hospital, Theodor Stern Kai 7, Frankfurt, Germany.*

<sup>3</sup> *German Centre for Cardiovascular Research (DZHK), Partner site RheinMain, Frankfurt, Germany.*

<sup>4</sup> *Institute of Pharmacology and Toxicology, Versbacher-Str. 9, Würzburg, Germany.*

<sup>5</sup> *University Medicine Goettingen, Heartcenter – Clinic for Cardiology and Pneumology, Robert-Koch-Str. 40, Göttingen, Germany.*

<sup>6</sup> *German Centre for Cardiovascular Research (DZHK), Partner site Göttingen, Göttingen, Germany.*

<sup>7</sup> *Ruhr University of Bochum, Heart-and Diabetes Center North Rhine-Westphalia, Department of General and Interventional Cardiology/Angiology, Bad Oeynhausen, Germany.*

<sup>8</sup> *Helmholtz Institute for Metabolic, Obesity and Vascular Research (HI-MAG) of the Helmholtz Zentrum München at the University of Leipzig and University Hospital Leipzig, Leipzig, Germany.*

<sup>9</sup> *Department of Internal Medicine III, University of Heidelberg, Heidelberg, Germany.*

<sup>10</sup> *German Centre for Cardiovascular Research (DZHK), Partner site Heidelberg, Heidelberg, Germany.*

<sup>11</sup> *Heart Center Leipzig at University of Leipzig and Leipzig Heart Institute, Leipzig, Germany.*

<sup>12</sup> *University of Kiel, Dept. of Internal Medicine III, Kiel, Germany.*

<sup>13</sup> *German Centre for Cardiovascular Research (DZHK), partner site Hamburg/Kiel/Lübeck, Germany.*

\*Corresponding author:

Jes-Niels Boeckel, PhD

Klinik und Poliklinik für Kardiologie

Max-Bürger-Forschungszentrum (MBFZ)

Universitätsklinikum Leipzig

Johannisallee 30

04103 Leipzig

Boeckel@medizin.uni-leipzig.de

# Supplementary Fig. 1

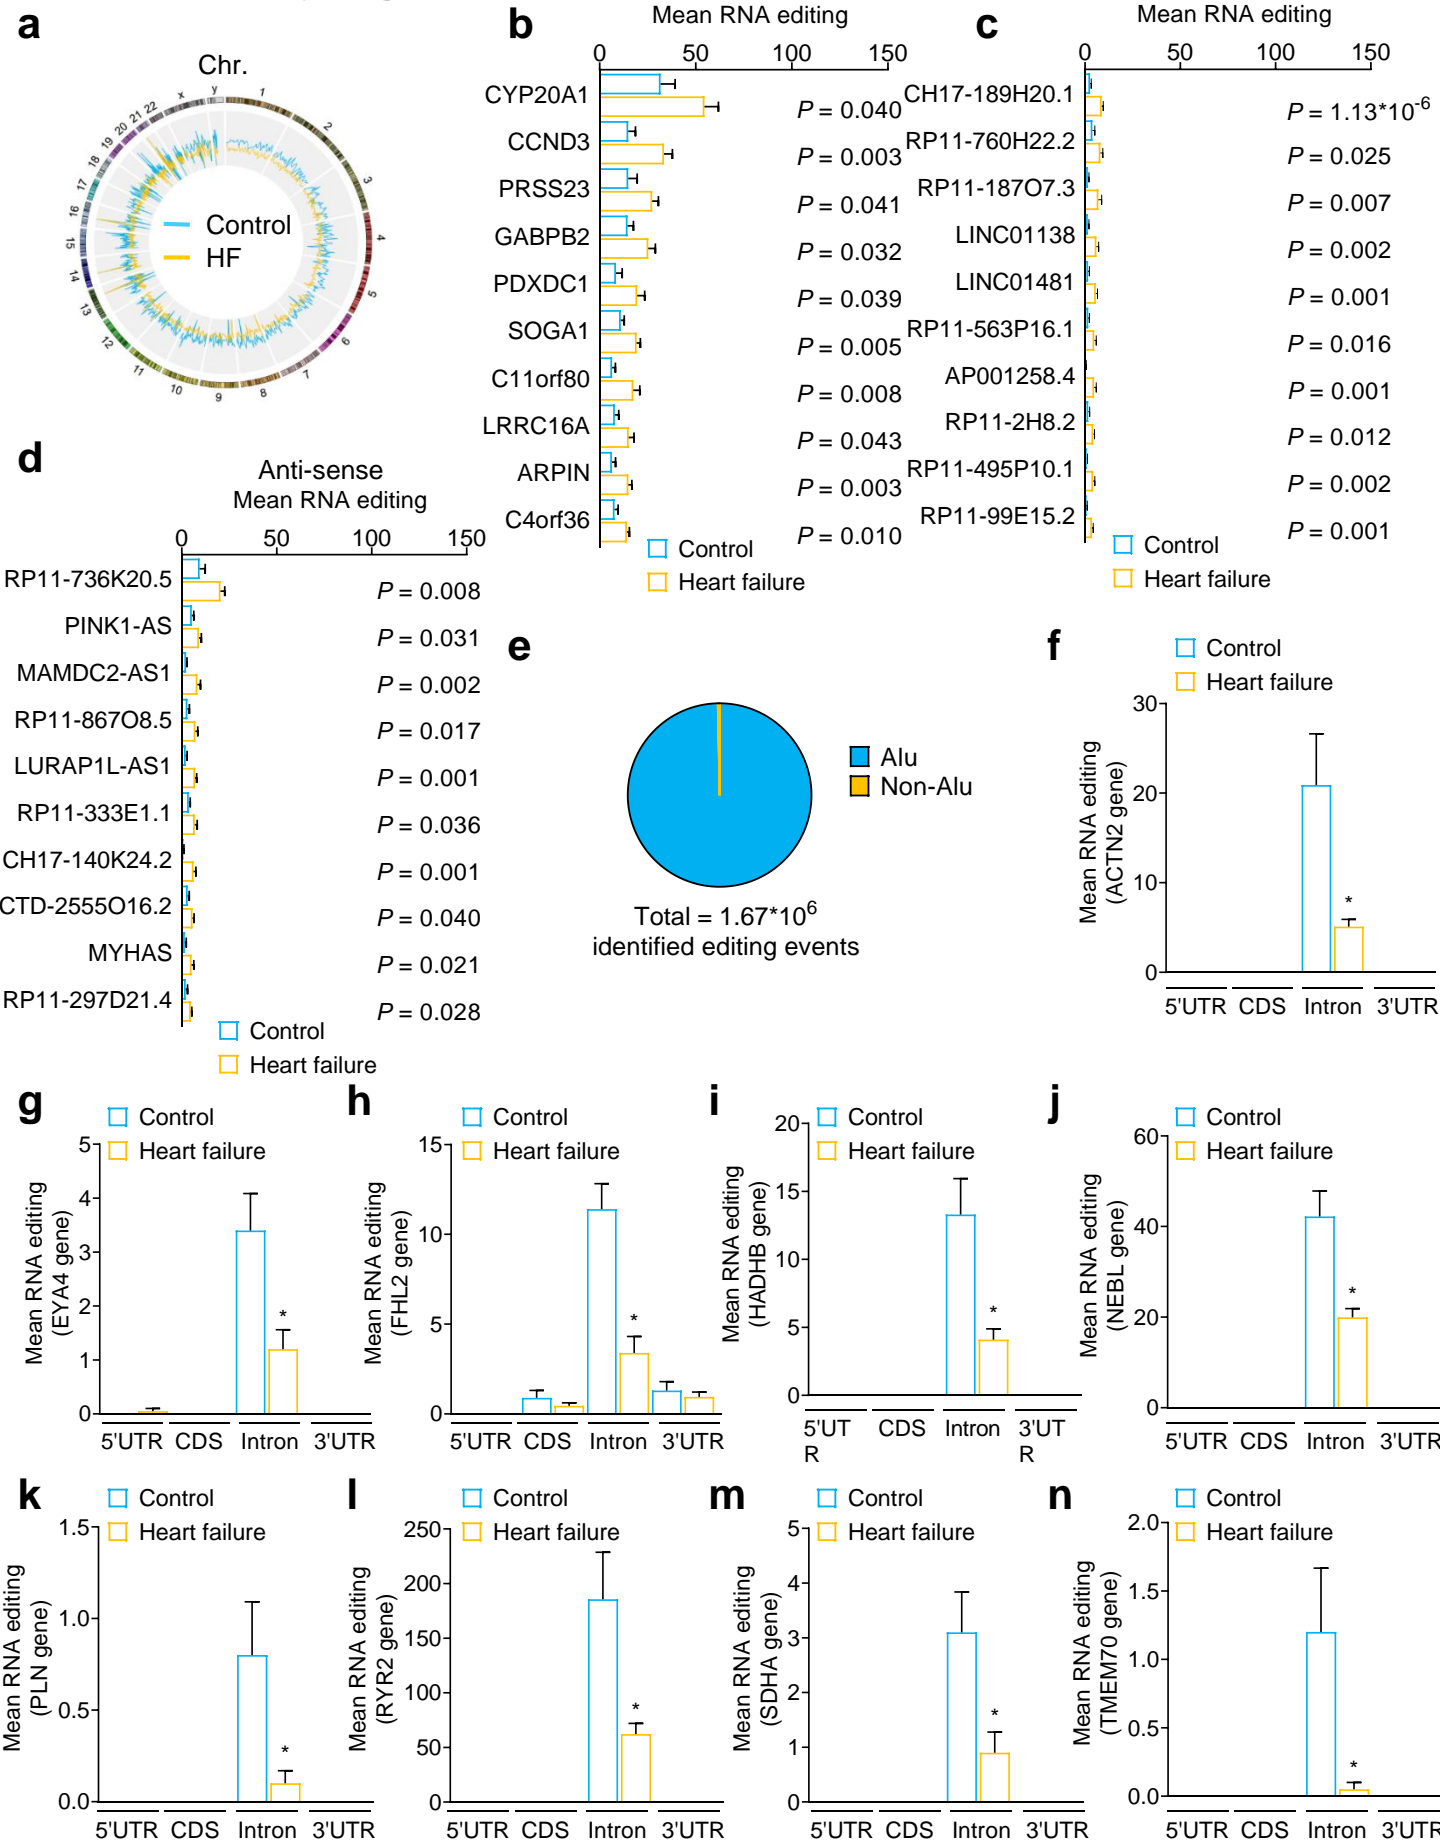

# Supplementary Fig. 2

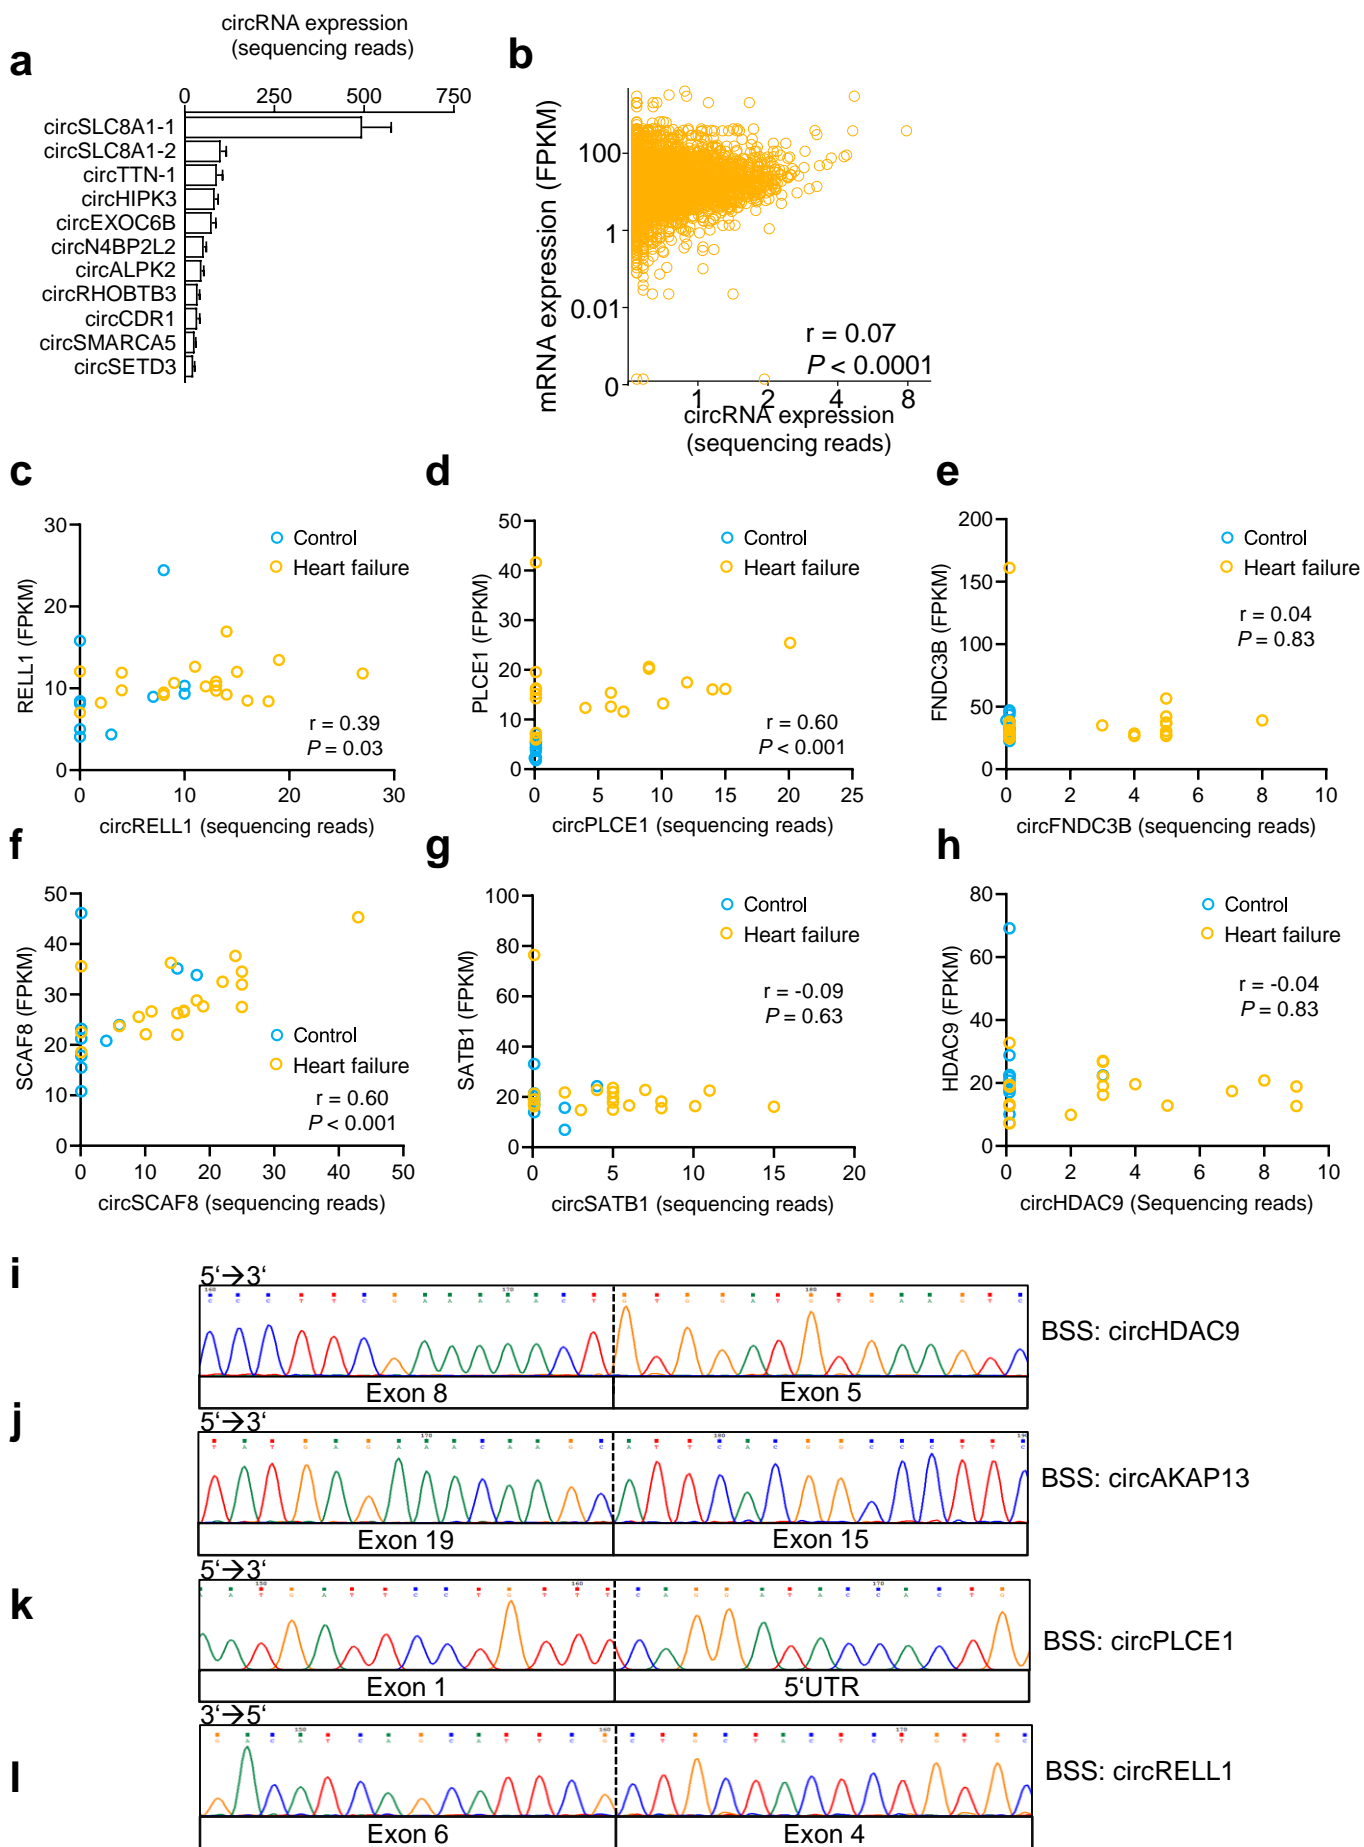

# Supplementary Fig. 3

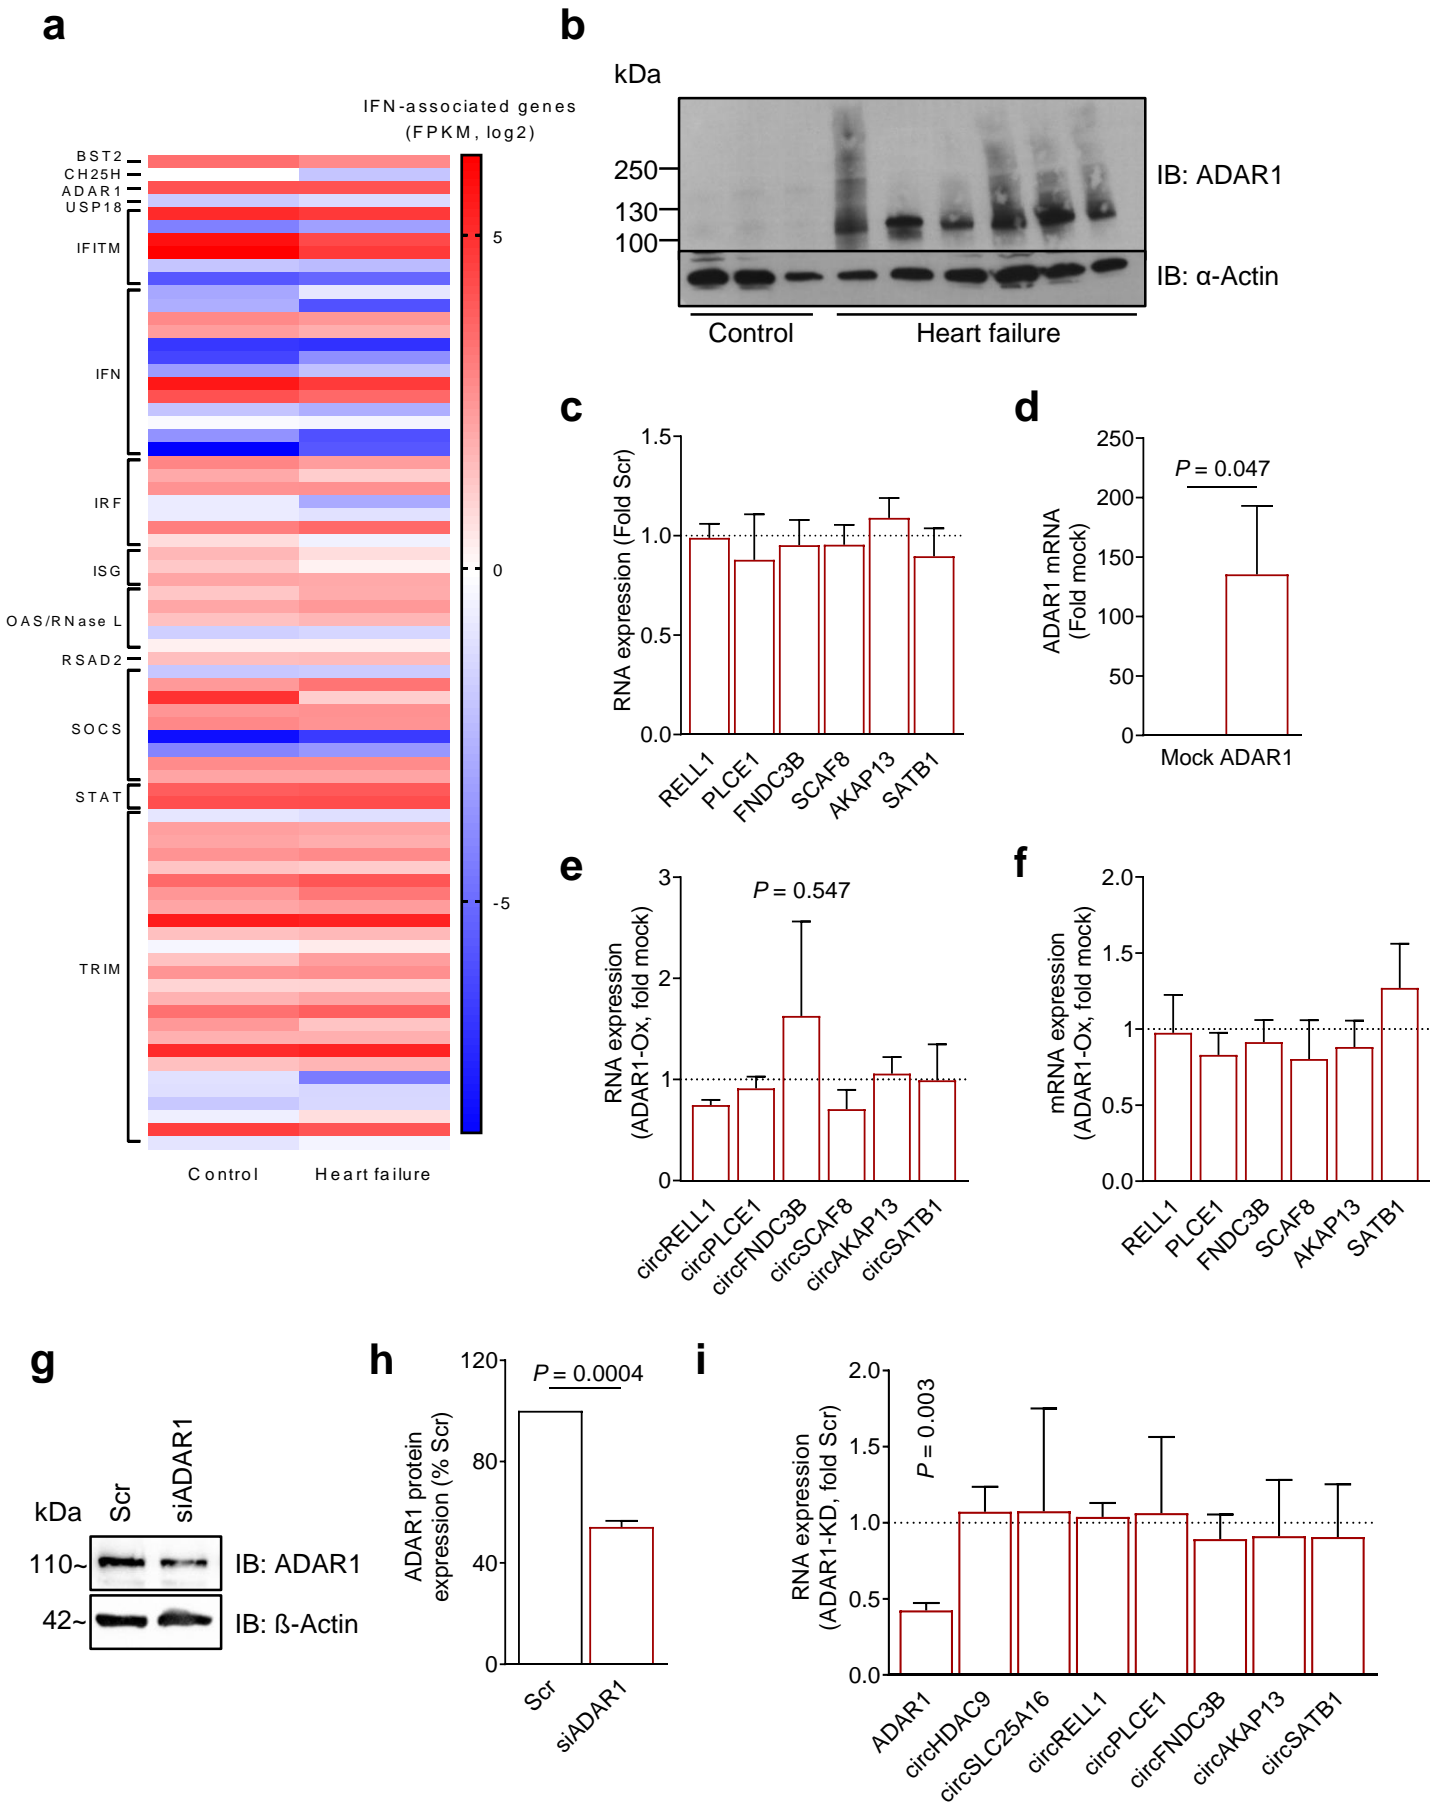

Supplementary Fig. 4

a

5'AluSx3

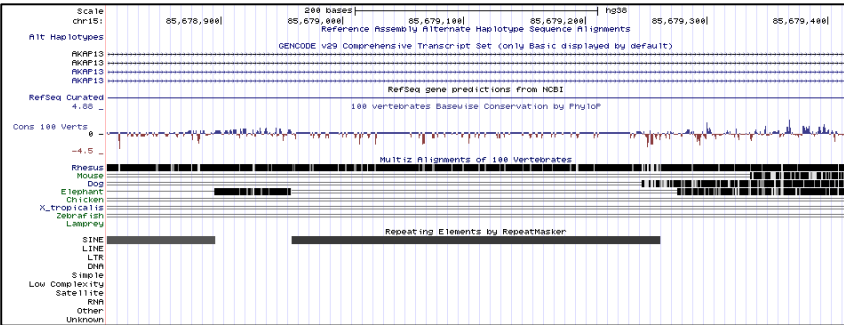

b

5'AluSz

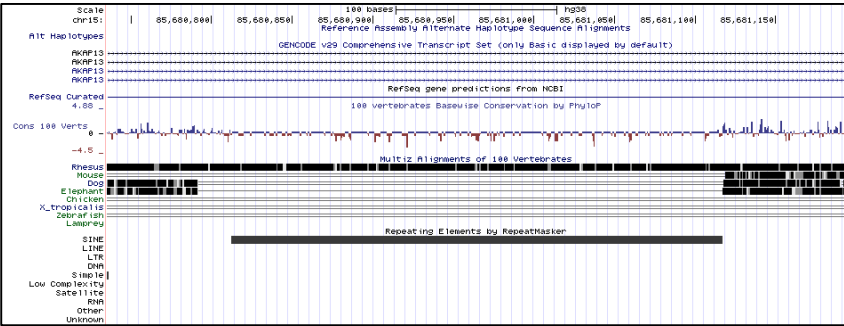

c

3'AluSz

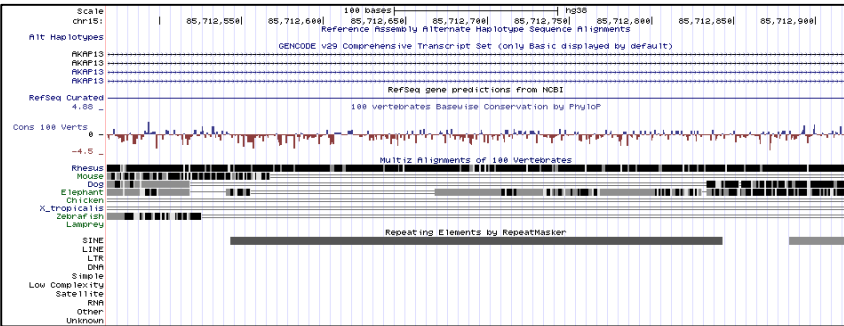

d

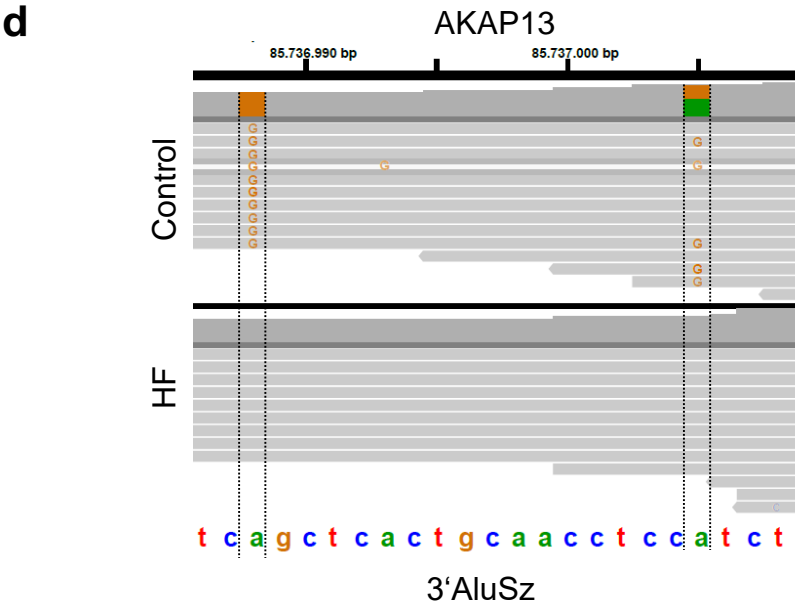

Supplementary Fig. 5

**a**

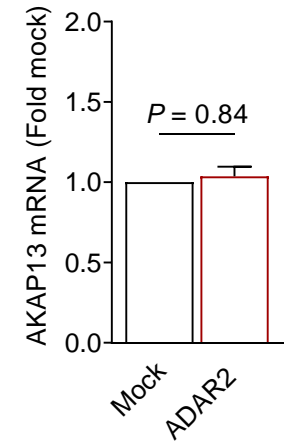

**b**

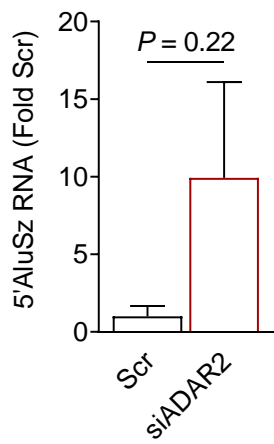

**c**

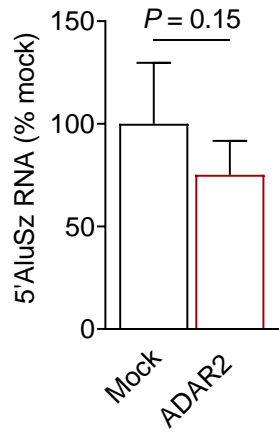

**d**

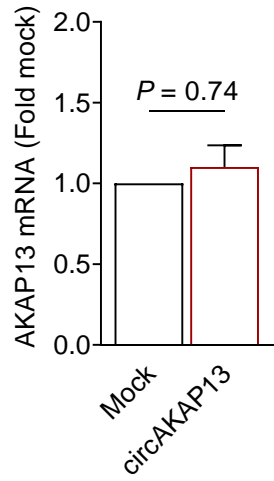

**e**

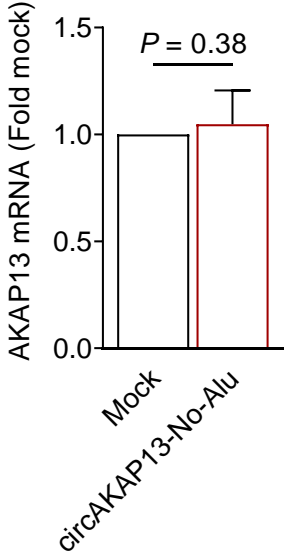

Supplement: MOESM1 [file 395_2022_940_MOESM1_ESM.pdf › 395_2022_940_MOESM1_ESM.pdf]
